# Supplementary material
Source: PubMed Central journal article supplement (PMC341771)

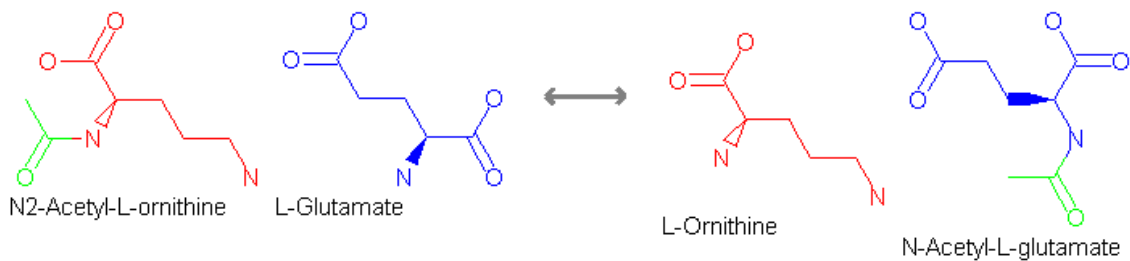

EC 2.3.1.35: glutamate N-acetyltransferase

Jeong *et al.*

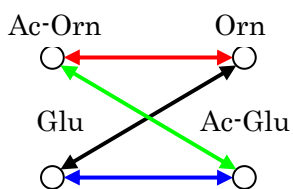

Wagner and Fell

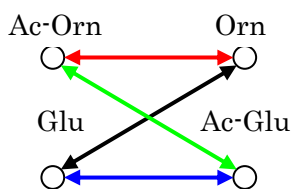

Ma and Zeng

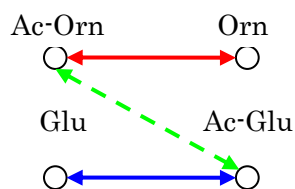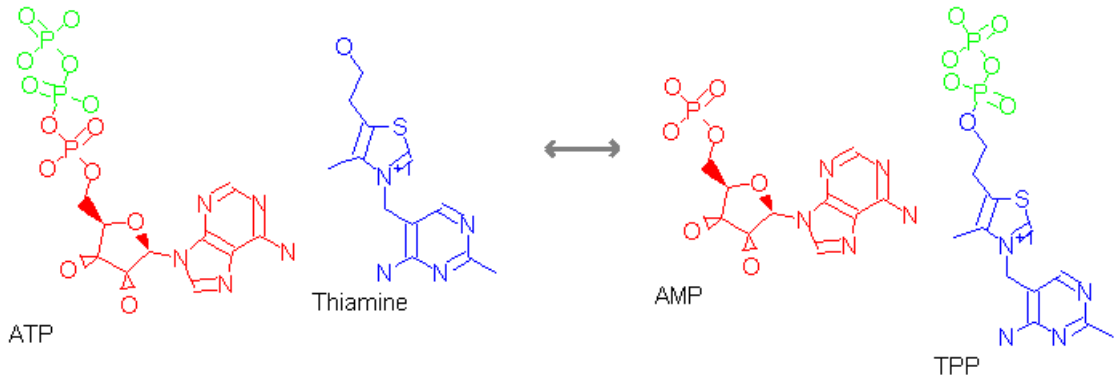

EC 2.7.6.2: thiamine diphosphokinase

Jeong *et al.*

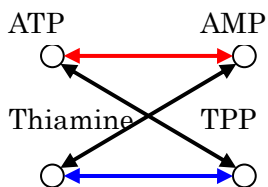

Wagner and Fell

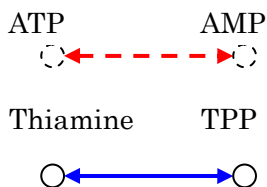

Ma and Zeng

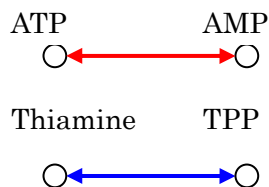

Supplement: pnas_0306458101_2.pdf [file pnas_0306458101_2.pdf]
